# Supplementary material for: Protocol for the modeling the epidemiologic transition study: a longitudinal observational study of energy balance and change in body weight, diabetes and cardiovascular disease risk
Source: Springer Nature journal article supplement (doi:10.1186/1471-2458-11-927), 2011-12-01
Supplement: 12889_2011_3828_MOESM1_ESM.pdf [file 12889_2011_3828_MOESM1_ESM.pdf]

**METS Coordinating Center**  
Loyola University Chicago

```
graph TD; A["METS Coordinating Center  
Loyola University Chicago"] --- B["Ghana Site  
Nkwantakese, GH  
Kwame Nkrumah  
University of Science &  
Technology"]; A --- C["South Africa Site  
Khayelitsha,  
Cape Town, SA  
University of Cape  
Town"]; A --- D["Jamaica Site  
Kingston, JA  
University of the West  
Indies, Mona"]; A --- E["Seychelles Site  
Victoria, Mahé, SE  
Seychelles Ministry of  
Health"]; A --- F["US Site  
Maywood, IL, USA  
Loyola University  
Chicago"];
```

**Ghana Site**  
Nkwantakese, GH  
Kwame Nkrumah  
University of Science &  
Technology

**South Africa Site**  
Khayelitsha,  
Cape Town, SA  
University of Cape  
Town

**Jamaica Site**  
Kingston, JA  
University of the West  
Indies, Mona

**Seychelles Site**  
Victoria, Mahé, SE  
Seychelles Ministry of  
Health

**US Site**  
Maywood, IL, USA  
Loyola University  
Chicago
